# Supplementary material
Source: HighWire-hosted journal article supplement (https://www.cmaj.ca/highwire/filestream/58360/field_highwire_adjunct_files/0/recombinant-lin-1-at.pdf)
Supplement: recombinant-lin-1-at.pdf [file recombinant-lin-1-at.pdf]

## Appendix 1 (as supplied by the authors): Strategy for literature search

The following databases were searched, where possible, to January 18, 2010:

NHSBT SRI Handsearching Databases

CENTRAL (*The Cochrane Library* Issue 4, 2009)

MEDLINE

EMBASE

CINAHL

PubMed (for papers ahead of print): (activated factor vii or factor viia or rfvia or fvia or activated rfvii or activated fvii) AND random\*

LILACS

KoreaMed

IndMed

PakMediNet

mRCT (incl. NRR archive)

ClinicalTrials.gov

### CENTRAL

#1 FACTOR VIIA single term (MeSH)

#2 factor viia OR factor 7a OR rfvia OR fvia

#3 (activated NEAR/2 factor seven) OR (activated NEAR/2 factor vii) OR (activated NEAR/2 rfvii) OR (activated NEAR/2 fvii)

#4 novoseven\* OR novo seven\* OR eptacog\* OR proconvertin\*

#5 #1 OR #2 OR #3 OR #4

#6 HEMORRHAGE explode all trees (MeSH)

#7 hemorrhag\* or haemorrhag\* OR bleed\* OR bloodloss\* OR blood NEAR/3 los\* OR ICH

#8 HEMOSTASIS explode all trees (MeSH)

#9 hemosta\* OR haemostat\*

#10 surg\* or operat\* OR perioperat\* OR resect\* OR transplant\* OR \*tomy  
OR trauma\* or transfus\* or emergenc\* or polytrauma\* or injur\* or accident\*

#11 #6 or #7 or #8 or #9 or #10

#12 #5 and #11

### MEDLINE (Ovid)

1. FACTOR VIIA/

2. (factor viia OR factor 7a OR rfvia OR fvia).mp.

3. ((activated adj2 factor seven) OR (activated adj2 factor vii) OR (activated adj3 rfvii) OR (activated adj2 fvii)).mp.

4. (novoseven\* OR novo seven\* OR eptacog\* OR proconvertin).mp.

5. or/1-4

6. exp HEMORRHAGE/

7. (hemorrhag\* OR haemorrhag\* OR bleed\* or bloodloss\* or blood loss\* OR ICH).mp.

8. exp HEMOSTASIS/

9. (hemosta\* OR haemosta\*).mp.

10. (hemosta\* OR haemosta\* or surg\* or operat\* or resect\* or perioperat\* or

trauma\* or transfus\* or emergenc\* or polytrauma\* or injur\* or accident\*).mp.

11. or/6-10
12. 5 AND 11

### **EMBASE**

1. BLOOD CLOTTING FACTOR 7A/
2. (factor viia OR factor 7a OR rfviia OR fviia).mp.
3. ((activated adj3 factor seven) OR (activated adj3 factor vii) OR (activated adj3 rfvii) OR (activated adj3 fvii)).mp.
4. (novoseven\* OR novo ADJ seven\* OR eptacog\* OR proconvertin).mp.
5. or/1-4
6. exp BLEEDING/
7. (hemorrhag\* OR haemorrhag\* OR bleed\* or bloodloss\* or blood near los\* OR ICH).mp.
8. HEMOSTASIS/
9. (hemosta\* or haemosta\*).mp.
10. (surg\* or operat\* or resect\* or perioperat\* or trauma\* or transfus\* or emergenc\* or polytrauma\* or injur\* or accident\*).mp.
11. or/6-10
12. 5 AND 11

### **CINAHL (NLH Platform)**

1. (factor AND viia OR factor AND 7a OR rfviia OR fviia).ti,ab
2. ((activated adj2 factor seven) OR (activated adj2 factor vii) OR (activated adj3 rfvii) OR (activated adj2 fvii)).ti,ab
3. (novoseven\* OR novo AND seven\* OR eptacog\* OR proconvertin).ti,ab
4. 1 OR 2 OR 3
5. exp HEMORRHAGE/
6. (hemorrhag\* OR haemorrhag\* OR bleed\* OR bloodloss\* OR blood AND loss\* OR ICH).ti,ab
7. exp HEMOSTASIS/
8. (hemosta\* OR haemosta\* OR surg\* OR operat\* OR resect\* OR perioperat\* OR trauma\* OR transfus\* OR emergenc\* OR polytrauma\* OR injur\* OR accident\*).ti,ab
9. 5 OR 6 OR 7 OR 8
10. 4 AND 9

### **LILACS**

factor viia OR activated factor vii OR activated fvii OR activated rfvii OR rfviia OR fviia OR novoseven OR novo seven

### **FREE TEXT SEARCHING**

((factor OR activate\*) AND (seven OR vii OR rfvii OR fvii OR viia OR 7a OR 7)) OR (novoseven))  
AND

(hemorrhag\* or haemorrhag\* or bloodloss or blood-loss\* or bleed\* or hemosta\* or haemosta\* or surg\* or trauma\* or transfus\*)

mrct: "factor viia" OR "factor 7" OR rfviia OR fviia OR novoseven OR "activated factor seven" OR "activated factor vii" OR "activated rfvii" OR "activated fvii"
